# Supplementary material for: Disruption of Endochondral Ossification and Extracellular Matrix Maturation in an Ex Vivo Rat Femur Organotypic Slice Model Due to Growth Plate Injury
Source: MDPI journal article supplement (doi:10.3390/cells12131687), 2023-06-22
Supplement: s1 [file s1]

## Supplementary

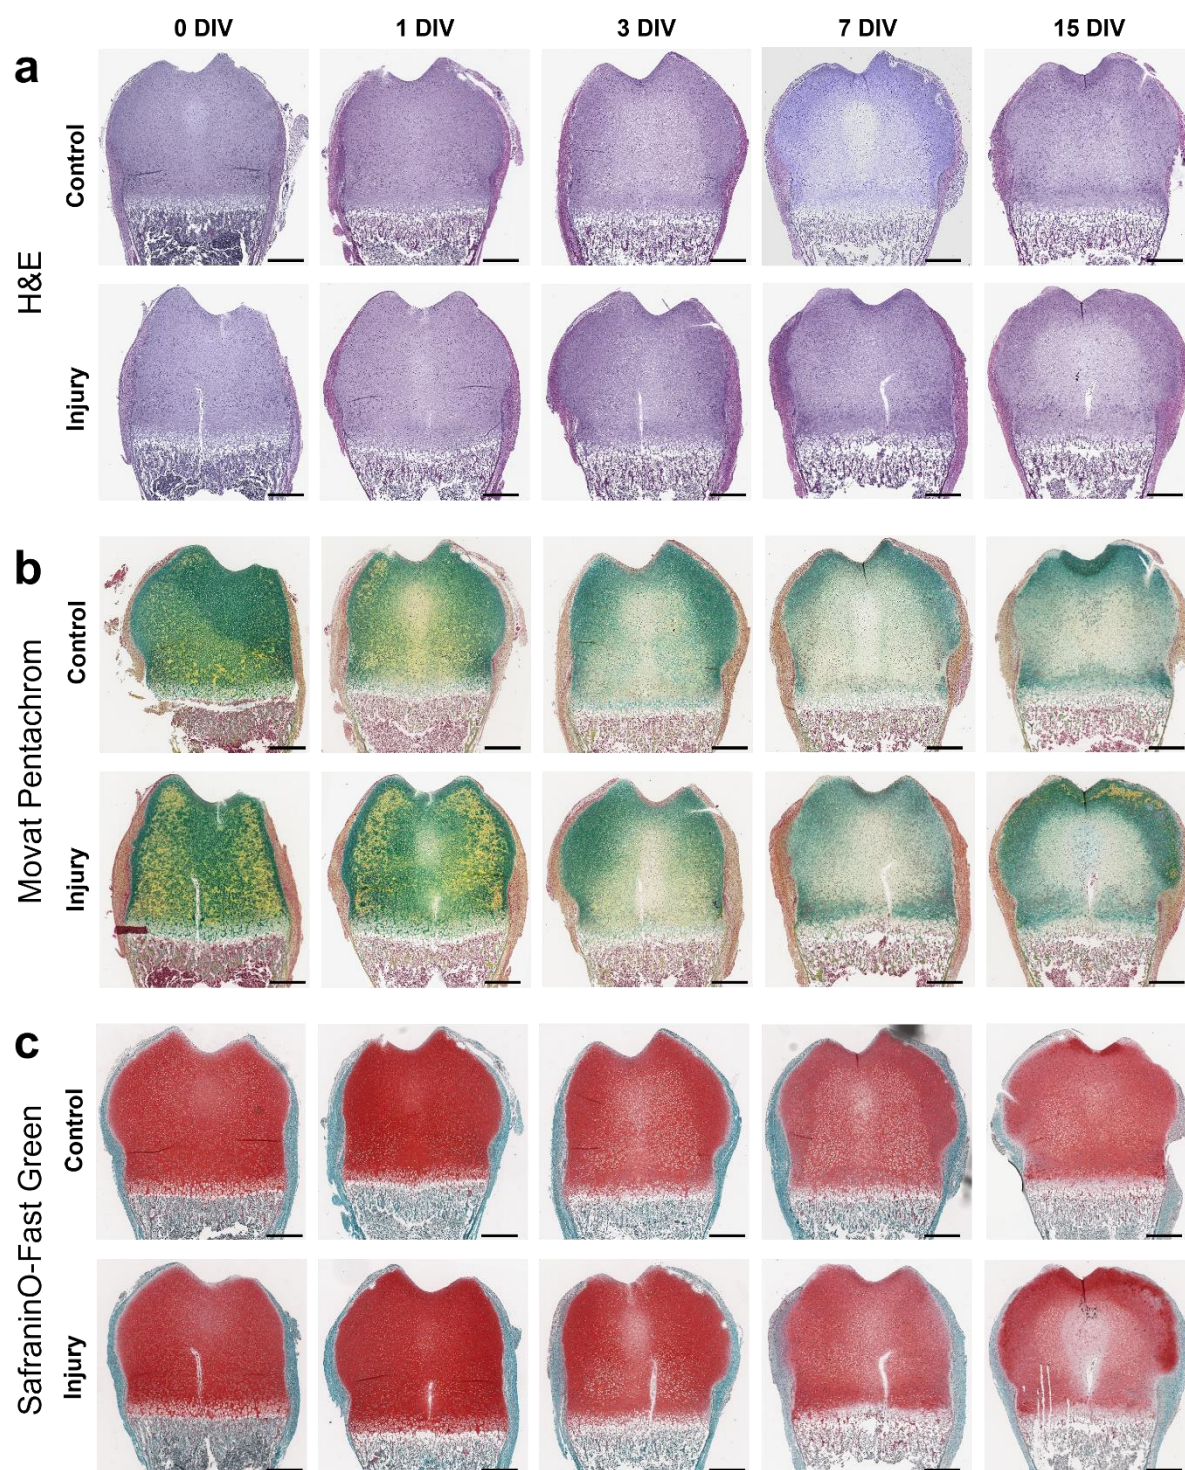

**Supplementary Figure S1. Proximal rat femur of bone slices with and without growth plate injury were stained with different histological staining.** Representative images of (a) Hematoxylin and eosin stain (H&E), (b) Movat Pentachrome and (c) SafraninO-Fast Green stain of proximal rat femur of injured and non-injured control slices at 0, 1, 3, 7, and 15 days of *in vitro* culture (DIV). Scale bar = 500  $\mu$ m.



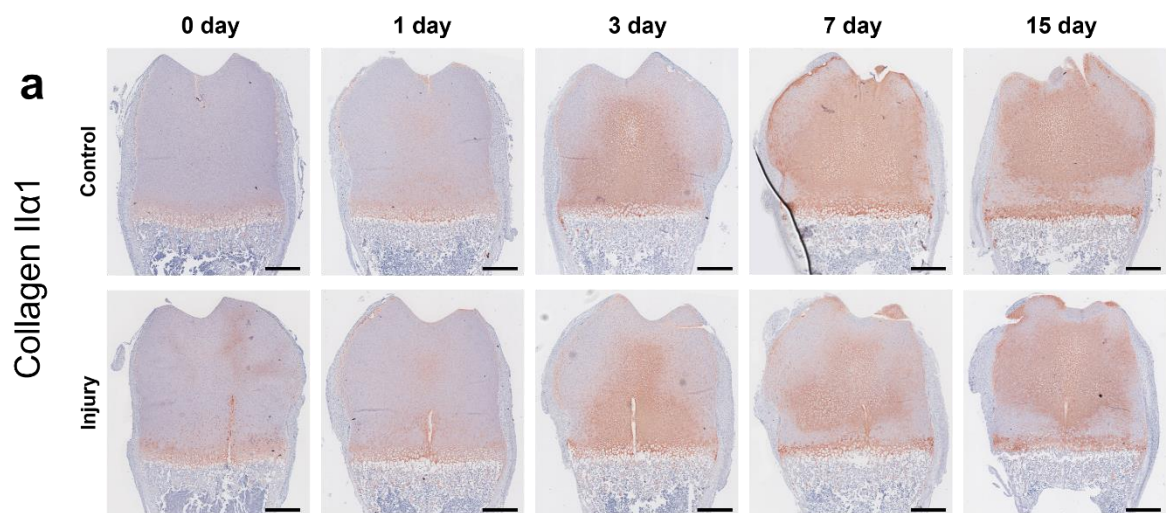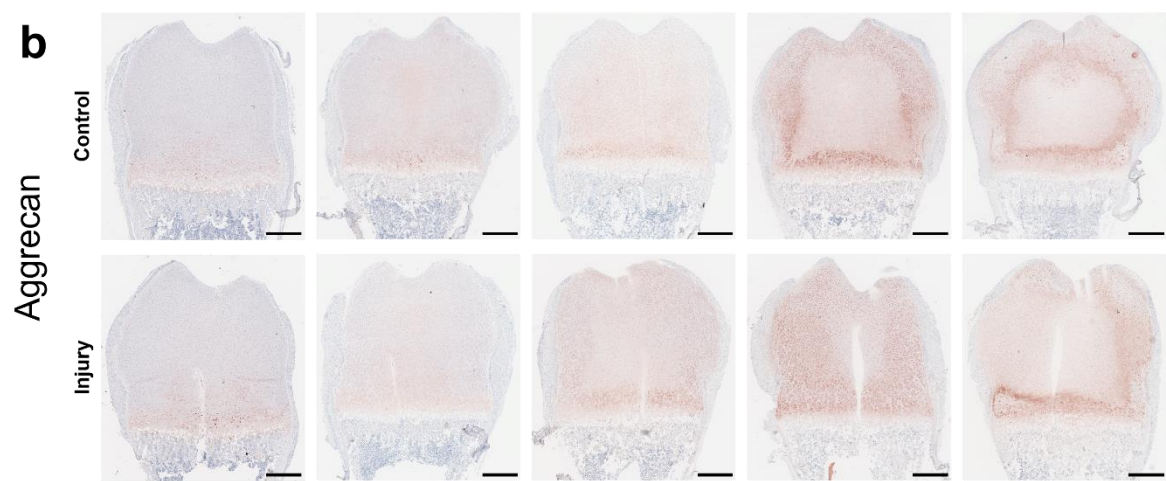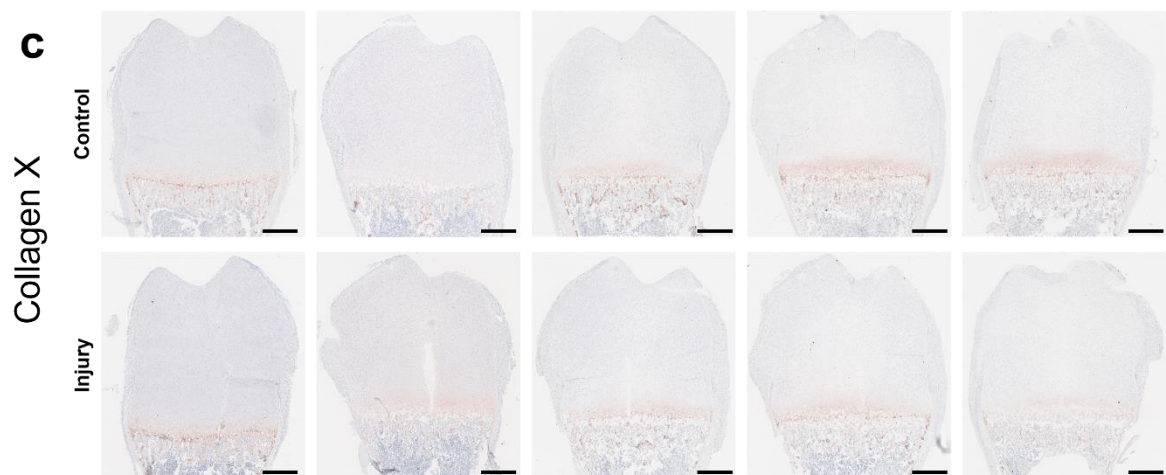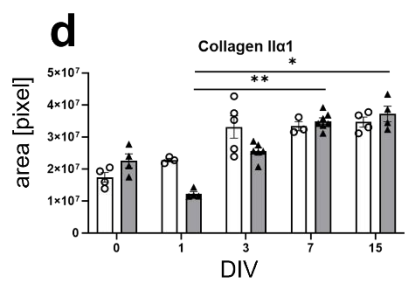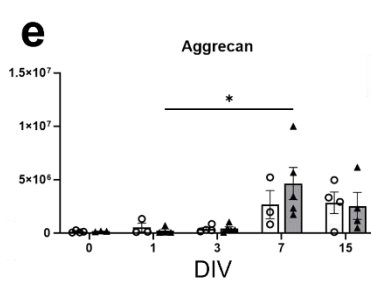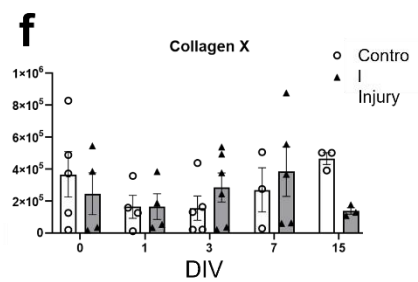

**Supplementary Figure S2. Extracellular matrix (ECM) cartilage composition and chondrocyte maturation.** (a-c) Maturation of chondrocytes are accompanied with the expression of type II collagen (Col2 $\alpha$ 1, committed chondrocytes), aggrecan (Acan, metabolic active chondrocyte) and type X collagen (ColX, hypertrophic chondrocytes); Scale bar = 500  $\mu$ m. (d-f) Positive stained pixel within immunohistochemistry were quantified. Statistical significance of the observed differences was tested either with Kruskal-Wallis-Test (temporal changes) or with Mann-Whitney-U Test (injury vs. control). Data are summarized as the mean  $\pm$  SEM and raw data were overlaid on histograms as triangles (injury) and circles (controls),  $n \geq 3$ , \* $p \leq 0.05$ , \*\* $p \leq 0.01$ .

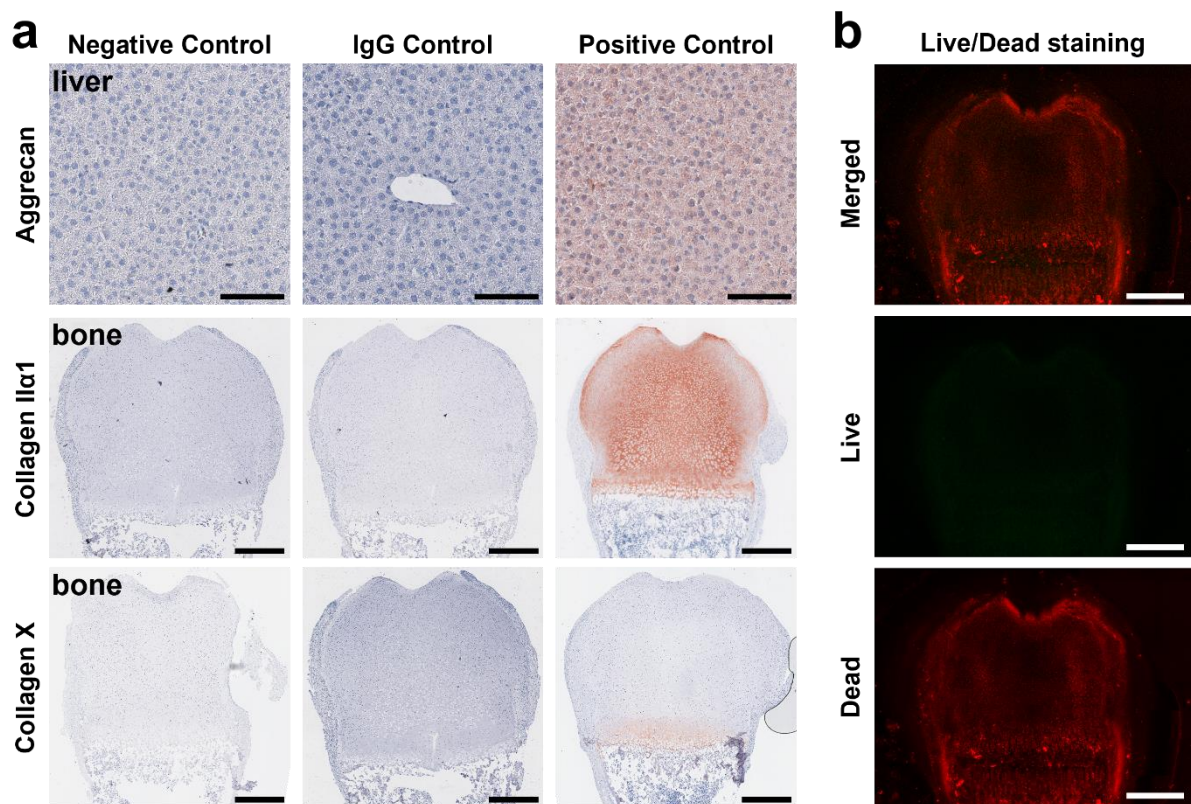

**Supplementary Figure S3. Immunohistochemistry (IHC) and live/dead staining controls.** (a) Immunohistochemistry controls with omission of primary antibody, IgG antibody in the same concentration as respective primary antibody and respective positive tissue control. Scale bar = 250  $\mu$ m liver (aggrecan) and 300  $\mu$ m bone slices (collagen II $\alpha$ 1 and collagen X). (b) Bone slice incubated in ethanol overnight served as dead positive controls. Scale bar = 500  $\mu$ m.
